# Supplementary material for: Understanding room-temperature metastability of graphene oxide utilizing hydramines from a synthetic chemistry view
Source: Royal Society of Chemistry journal article supplement (doi:10.1039/c5ra05742f), 2015-01-01
Supplement: c5ra05742f1.pdf [file c5ra05742f1.pdf]

## Supporting Information

### **Understanding room-temperature metastability of graphene oxide utilizing hydramines from a synthetic chemistry view**

Yueyue Qian,<sup>a</sup> Shupeng Zhang<sup>\*a</sup>, Juanjuan Gao<sup>a</sup> and Haiou Song<sup>\*b</sup>

<sup>a</sup> School of Chemical Engineering, Nanjing University of Science and Technology, Nanjing, Jiangsu, 210094, China. E-mail: shupeng\_2006@126.com

<sup>b</sup> State Key Laboratory of Pollution Control and Resource Reuse, School of the Environment, Nanjing University, Nanjing, Jiangsu, 210023, China, E-mail: songhaiou2011@126.com

## **1 Experimental**

### **1.1 Materials**

Natural graphite was obtained from Qingdao Zhongtian Company. Ethanol amine (AE), amino-1-propanol (AP), 4-amino-1-butanol (AB) and others chemical reagents were analytical grade and used as received without further purification.

### **1.2 Fabrication of HA functionalized graphene oxide nanomaterials**

Graphene oxide used in this work was synthesized by oxidation of natural graphite powder using the modified Hummers method. As a typical example, the sample prepared with powdery GO and Ethanol amine (AE) is labeled as AE-mGO for easy expression. The synthesis procedure for a typical well-dispersed AE-mGO compound was carried out as follows: 200 mg of GO was added into 15 mL of *N,N*-dimethylformamide under ultrasonication for 7 h and in this process GO was completely exfoliated into

individual sheets to form a stably dispersed GO/DMF solution. 1 g of AE was also dissolved in CHCl<sub>3</sub> (5 mL). Subsequently, a dispersion of AE was added dropwise to the GO solution and stirred vigorously for 2 d at room temperature. The mixture was then washed several times with CHCl<sub>3</sub> and ethanol to remove any impurities by filtration. Finally, the product was dried at 70 °C for 7 h in vacuum oven.

For the preparations of the AP-mGO and AB-mGO, all procedures are identical except the raw material is switched from AE to AP and AB respectively.

### **1.3 Fabrication of the PVA/1 wt%(HA-mGO) polymer nanocomposites**

In our case, PVA and HA-mGO can all be readily dispersed in D.I. water, which will help to achieve molecular level dispersion by solution blending. For the preparation of PVA/1 wt% (HA-mGO) polymer nanocomposites, the 1 % *wt.* HA-mGO nanofillers were first dispersed in water by ultrasonication. 1 g of PVA was also dissolved in water. Then, a dispersion of HA-mGO was dropwise added to the PVA solution and stirred vigorously for 10 h. At last, the composite solution was casted and dried at room temperature for 48 h and then in a vacuum oven for 7 h at 70 °C.

### **1.4 Characterization**

FT-IR spectroscopy of GO-based hybrid materials were collected on a Nicolet IS-10 FT-IR spectrometer equipped with a Smart OMNI sampler with a high purity Ge crystal. Raman spectra of samples were measured from 1000 to 2000 cm<sup>-1</sup> on a LabRAM ARAMIS (HORIBA Jobin Yvon S.A.S.) using an excitation wavelength of 532 nm. XRD analyses were performed on a Bruker D8 Advance diffractometer with Cu-K $\alpha$  radiation. The diffraction data was recorded for  $2\theta$  angles between 5° and 60°. The structure and morphology of the products were investigated by a JEOL JSM- 6380LV SEM. The elemental mappings were performed on a Zeiss Supra 40 field emission scanning electron microscope. Thermogravimetric analyses (TGA) were performed on a Mettler TGA/SDTA851e thermogravimetric

analyzer over the temperature range of 50-800 °C at a heating rate of 20 °C/min in a dry nitrogen atmosphere. X-ray photoelectron spectroscopy (XPS) analysis was obtained using PHIQuantera II with C60 high resolution spectrometer with a monochromatized Al Ka X-ray source (1486.71 eV photons) to analyze the chemical composition of the materials.

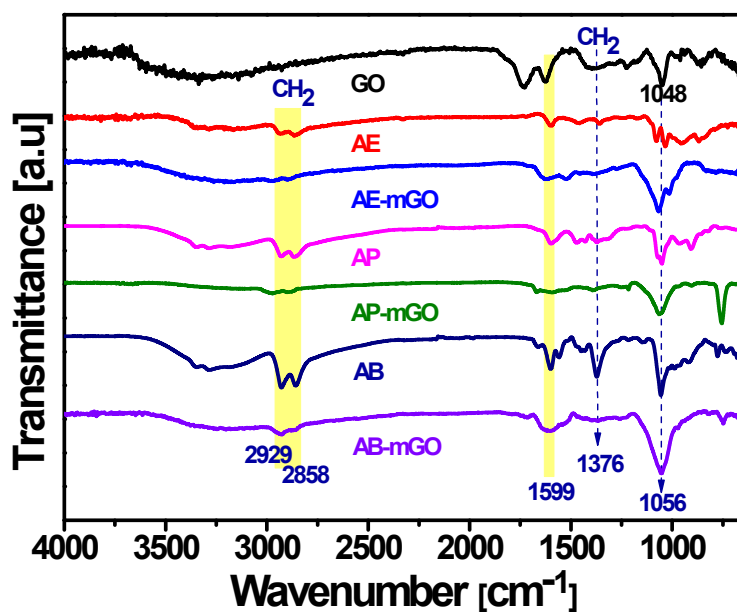

**Fig. S1** FT-IR spectra (b) of GO, AE, AP, AB, AB-mGO, AP-mGO and AE-mGO.

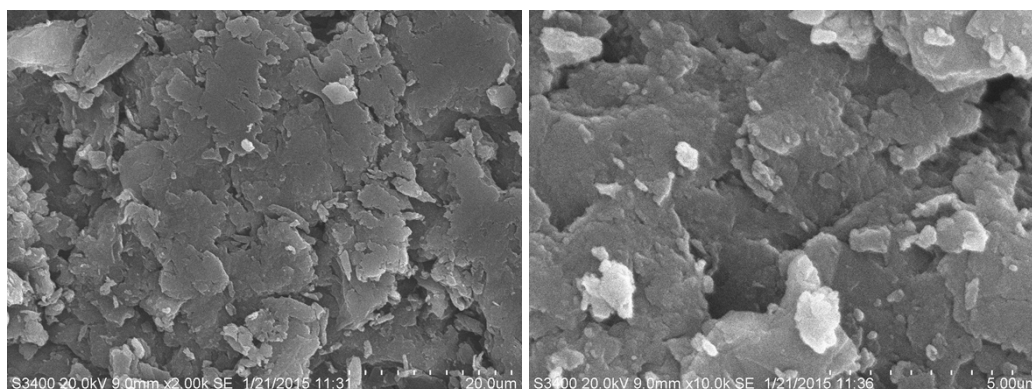

**Fig. S2** The clear layer shape structure of AP-mGO.

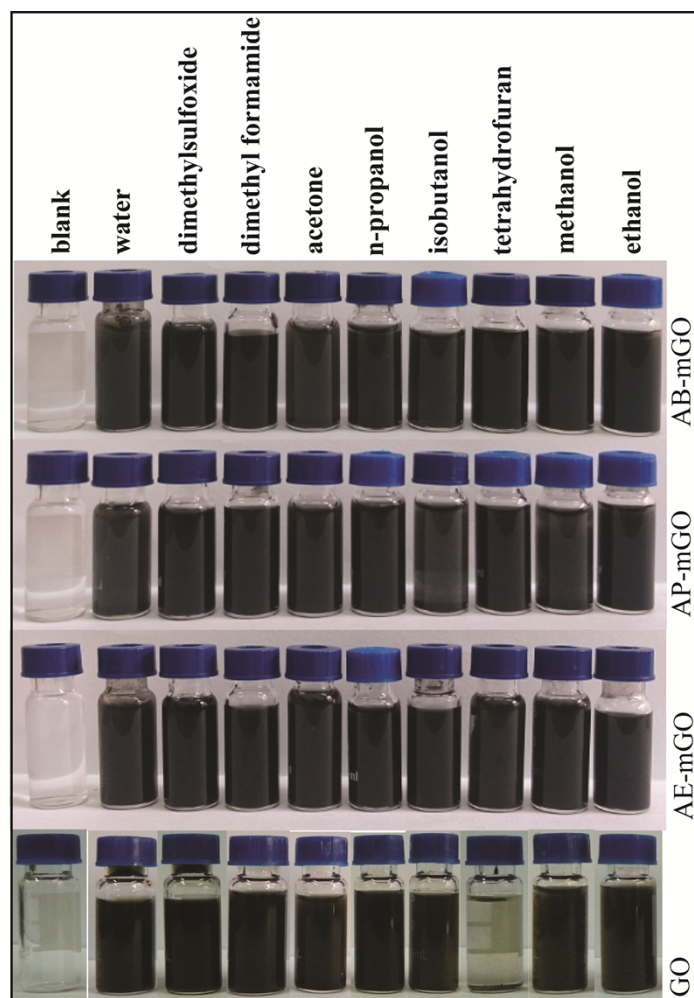

**Fig. S3** Photographs of AB-mGO, AP-mGO, AE-mGO and GO dispersed in water and 8 organic solvents through bath ultrasonication; Approximately 1.5 mg of powder was added to a given volume of solvent (~1.5 mL), in such a way that the resulting nominal concentration was adjusted to  $1 \text{ mg}\cdot\text{mL}^{-1}$  for all cases. The solvents are listed below, empty bottle as a comparison; water, dimethylsulfoxide, dimethyl formamide, acetone, n-propanol, isobutanol, tetrahydrofuran, methanol, ethanol.

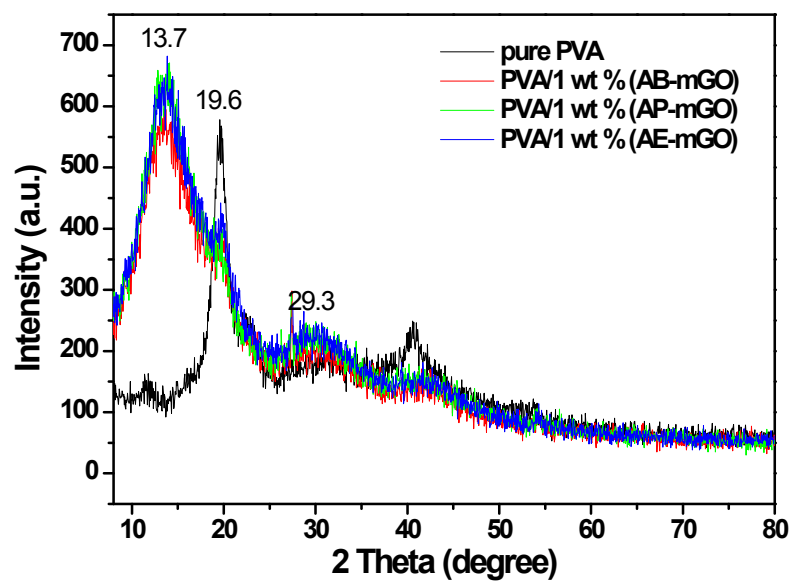

**Fig. S4** XRD patterns of PVA-based nanocomposites with different HA-mGO as nanofillers.
